## **Universal Health Coverage – Exploring the What, How, and Why Using Realistic Review**

\*Aklilu Endalamaw<sup>1,2</sup>, Tesfaye Setegn Mengistu<sup>1,2</sup>, Resham B. Khatri<sup>1,3</sup>, Eskinder Wolka<sup>4</sup>, Daniel Erku<sup>1,5</sup>, Anteneh Zewdie<sup>4</sup>, Yibeltal Assefa<sup>1</sup>

<sup>1</sup>School of Public Health, The University of Queensland, Brisbane, Australia; <sup>2</sup>College of Medicine and Health Sciences, Bahir Dar University, Bahir Dar, Ethiopia; <sup>3</sup>Health Social Science and Development Research Institute, Kathmandu, Nepal; <sup>4</sup>International Institute for Primary Health Care in Ethiopia, Addis Ababa, Ethiopia; <sup>5</sup>Centre for Applied Health Economics, School of Medicine, Griffith University, Brisbane, Australia.

\*Corresponding author: [yaklilu12@gmail.com](mailto:yaklilu12@gmail.com)

## Abstract

**Background:** Universal health coverage (UHC) is a critical target in many health system strategies to achieve the ‘good health and wellbeing’. Evidence on the meaning and scope of UHC and the strategies required to achieve it are needed, as variations in its understanding and implementation have risen. We synthesised evidence on the meaning, components, significance, and strategies of UHC.

**Methods:** A review of evidence was conducted based on realist synthesis. We searched PubMed, EMBASE, Scopus, and Web of Science for published materials and websites for grey literature. We have followed some steps: define the scope of the review and develop initial programme theory, search for evidence, data extraction, and synthesis of evidence.

**Results:** Universal coverage, universal health, universal healthcare, universal access, and insurance coverage are used interchangeably with UHC. It is a legal notion that embodies a human rights-based and collaborative approach to ensure fair and comprehensive health care services. Universal health coverage is relevant for three macro reasons: first, it prevents and reduces the impact of diseases; second, it addresses inequality and promotes equity; and third, it is key for global health security. Various mechanisms involved to implement UHC, such as health insurance, social health protection, digital financing systems, value-based care, private sectors, civil societies, partnership, primary health care, and reciprocal health care systems.

**Conclusions:** Universal health coverage is a multifaceted concept that can be expressed by various terms in different contexts. Universal health coverage is a political and ethical imperative that aims to promote health equity and protect human dignity across different levels of society. It is essential in preventing diseases and serving a crucial role in global health security. Practically, UHC is not truly universal, as it does not include all services under its scheme and varies across countries. This requires consistent advocacy, strategic and operational research as well as political will to ensure UHC.

**Keywords:** universal health coverage, Universal coverage, mechanism, realist review

## Introduction

Universal health coverage (UHC) relies on key terminologies. ‘Universal’ represents ‘covering all without limit or exception’ (1); ‘health’ as ‘a state of complete physical, mental and social well-being and not merely the absence of disease or infirmity’ (2); and ‘coverage’ denotes ‘something that covers’ (health services and financial support) (3). This concept has

gradually become a prominent topic of discussion on the global stage (4). Yet, the combined meaning of these three words seems towards achieving the 1978 primary health care (PHC) ‘health for all’ declaration; both concepts strive for a healthier world (5).

Following the Millennium Development Goals (6), the UHC agenda endeavours to increase access to essential health services and reduce financial catastrophe due to health services costs. There have been improvements towards UHC globally; however, half of the world’s population still lacks access to essential health services (7). In addition, approximately 2 billion people are currently facing financial hardships, with 1 billion experiencing catastrophic out-of-pocket health spending, and 344 million individuals being pushed further into poverty (8). Less than 30% of countries (42 of 138 countries) were able to improve service coverage and reduce catastrophic out-of-pocket (OOP) health spending since 2015. This implies that the global progress towards UHC by 2030 is off-track (9). Most countries (108 out of 138 countries) experienced worsening or no significant change in service coverage since 2015 (9).

Some of the factors behind this inadequate progress towards UHC include lack of political commitment, fragmentation between public and private sectors, and lack of comprehensive health policies as well as weak health systems in low- and middle-income countries (10-12).

On the other hand, there is lack of clarity about the meaning and scope of UHC. Universal health coverage has been misunderstood or misinterpreted in different countries (13, 14). For example, in Kenya, there was a lack of agreement on stakeholders’ interpretation of what is to be understood by UHC (15). This misunderstanding of UHC may create challenges and confusion in delivering services, monitoring progress, celebrating successes, and sustaining efforts towards UHC (16).

Knowledge and evidence on ‘what works’ to achieving UHC have been identified as critical facilitators (17). Horton et al argued that ‘the great gap that now exists for countries trying to deliver UHC is access to a library of knowledge to assist their decision-making’ (18). To address this gap, there has been an increasing number of research publications. These include exploration of mapping the available literature on UHC (12), identification of best practices towards realizing UHC (19), measurement and attainment of UHC for older people (20) and people with stroke (21), and analysis of UHC’s influence on health policy (4). This raises variations in its understanding and implementation. We argue that it is timely to systematically and realistically review and synthesise the available evidence to guide policy

and implementation of the UHC agenda. This will provide detailed understanding of UHC, the reasons and significance and relevance of UHC, as well as the mechanisms towards UHC.

This article aims to synthesis the evidence on the meaning of UHC, its components, its significance, and implementation strategies to achieve it.

## **Methods**

We conducted a realist synthesis of literature rooted in the UHC's definition, principles, and implementation based on Pawson and colleagues realist review approach (22). This realist review approach follows four steps: define the scope of the review and develop initial programme theory, search for evidence, data extraction and appraisal, and synthesis of evidence.

### **Clarify the scope of the review and existing definition**

The realist review seeks to unpack the mechanisms by which strategies work and disclose for what reason or purpose it is required (23). Implementing realist synthesis will allow a deep understanding of UHC and link its strategies with the target population in the community by realizing linkage as a mechanism (24). We examined how, why, for whom and under what circumstances UHC works. As UHC strives for the comprehensive delivery of services in health system, it is possible to introduce the mechanisms that can support the health system (25). The structured definition of UHC was laid by WHO in 2010 with three dimensions: population coverage, service coverage, and financial coverage (26). Understanding the comprehensive pathway from the definition to the outcomes of UHC may require critical analysis and an understanding the principles to answer what UHC means. Additionally, the review addresses how UHC operates through which mechanisms or enabling conditions. Mechanisms are processes for enabling conditions, which operates in specific contexts to achieve the outcomes (e.g., service coverage or financial protection).

### **Search for evidence**

The search strategy is considered to identify all relevant evidence on UHC. We conducted a broad search to identify articles on UHC. We conducted meetings and discussions on the detailed elaboration of the conceptual frameworks that underpin the key principles of UHC to guide the search processes in electronic databases, grey literature search engines, and institutional websites (WHO and the World Bank/WB/). The search strategy and keywords were based on a broad search to locate various concepts, definitions, comments, perspectives,

and empirical results, which can provide an overview of the UHC. The broader search was supported by a focused and systematic search strategy and keywords for “Universal Health Coverage”, “Universal Coverage”, and “Universal Health Care”. The search strategy was adapted to each electronic database. Boolean operator (‘OR’) was applied when necessary, depending on the database. Supplementary file 1 provides a detail search strategy for databases.

We searched PubMed, SCOPUS, EMBASE, and Web of Science. Additionally, we accessed Google Scholar, Google, WHO website, UNs, UNIECF, and the WB website to retrieve unpublished work, grey literature, and guidelines or appropriate reports. We also checked the reference lists of eligible articles for further inclusion. We included materials from the inception of each database up to the end of November 2023, without restriction on language, time, settings or country, and article types. Articles contribute to one of the main addressed issues, which are what? how? and why? were considered, including editorials, opinion/position pieces, commentaries, realist evaluations, perspectives, qualitative and quantitative studies, programme manuals, and systematic and scoping reviews.

We exported all retrieved articles to EndNote 20 and removed all the duplicate. We then screened articles using title and abstract screening, and full text using eligibility assessment criteria. The search results from Google Scholar, Google, UNs, UNIECF, WHO and WB websites, and searches from reference lists of those articles that passed full-text screening were again checked for duplication and final eligibility. The search strategy, the screening process, and overall activities were evaluated during weekly meetings of the authors of this review.

### **Appraise and extract evidence**

Article appraisal in realistic review does not follow a similar approach to traditional systematic review, which categorizes articles in a hierarchy. Realist review examines complex areas of reality by considering highly diverse sources of evidence. It relies on specific elements of reports from the included article to support context, mechanism, and outcome. Hence, in a realistic review, appraisal of evidence provides attention to ensure whether an article addresses the issues under examination or the worth of an article in evidence synthesis. Data extraction is followed after deciding to include relevant articles in the evidence synthesis (22).

Data extraction in this realist synthesis was conducted by taking notes, highlighting, and labelling the relevant sentences that fit what UHC mean? how does it work (action, mechanism, and outcome)? Or why UHC is important? This is based on the realist review data extraction approach by which ‘realist review assimilates information more by note-taking and annotation than by extracting data as such’(22). In this review, data extraction was conducted first and then data relevant to how UHC operates, which consists of action, mechanisms, and outcome, was checked. Finally, relevant information on the importance of UHC was highlighted and labelled. One article was evaluated for these three areas before being passed to the next article. However, it was not a must for an article to present the three main areas; it was enough if it included only one of the three questions. Overall, an iterative data extraction process was conducted.

### **Evidence synthesis**

Synthesis of the extracted data was conducted according to the realist review approach (22). In this phase, the extracted data, highlighted during the data extraction phase, was collated into a similar or unique theme. Themes were developed under what, how, and why of UHC (according to the current review questions) based on the findings from the included evidence. The synthesis was mainly dependent on reasoning using a realistic logic of analysis. We also presented Australia’s experience as a case study primarily to show the three dimensions of UHC and its supportive strategy. The data for this case study was based on the date from the Australian Government website as of 25 December 2023 (27).

## **Results**

### **Search results**

A total of 25,853 documents were found in electronic databases and websites. A total of 12,148 were found in Scopus, followed by PubMed (8,426), Web of Science (2,658), EMBASE (2,542), and Google Scholar (71). Additionally, we have found eight documents from websites (UN, WHO, WB, and UNIECF) (Figure 1). A total of 124 articles were included in this review. Characteristics of included documents, such as author/year, article category, study design, country, and inclusion purpose, are provided in supplementary file 2.

### **Main findings**

The findings of the review are presented below according to the objectives of the study: (1) what is universal health coverage; (2) why is universal health coverage relevant? and (3) how is universal health coverage implemented?

### **What is Universal Health Coverage?**

Our synthesis shows that UHC is expressed interchangeably with universal coverage, universal health, universal healthcare, universal access, and insurance coverage (28-35). Likewise, operational managers in South Africa defined UHC as ‘health for all’ (36).

In some context (e.g., Asia and Pacific region), UHC is also explained as a process of delivering quality, equitable, and comprehensive care and services, including promotive, preventive, curative, rehabilitative, and palliative care with affordable cost or without financial barriers (37, 38). Here, it is important to note that the term ‘affordability’ of care has various understandings, including free of costs (e.g., avoiding direct payments), prepaid through government-funded health service schemes, having large risk pools to ensure sustainable cross-subsidy between the healthy and wealthy and the sick and the poor, and covering the informal sector and households living on or below the poverty line financially (37-39). Under UHC, people can access services regardless of their ability to pay, and no citizen is denied service due to inability to pay (10).

Universal health coverage is considered as a legal concept and humanitarian concept, social (equitable entitlement and enrolment to the social security system), a health economic (financial protection), and a public health concept (comprehensive services versus essential packages) (40). In these contexts, our synthesis shows that UHC has critical values, such as the right to health, social justice or equity in access, solidarity, quality, service coverage, population coverage (inclusiveness), and financial protection (affordability) (9, 19, 29, 41-44). Policy actors also identify values, such as quality of care, equity, financial risk protection, and a comprehensive set of services for every one with any health conditions as features of UHC (10).

Universal health coverage is defined as a target or goal: access and financial protection (9). In this circumstance, UHC should be evaluated and measured for ‘what services are covered?’, ‘how much do people must pay to receive services?’, and ‘who is covered?’ Globally, UHC is monitored using effective service coverage and financial protection indicators (41).

Universal health coverage regarding service coverage is called effective service coverage in the monitoring metrics. Effective coverage is a measure that unites intervention need, use, and quality (45). However, it is important to note that UHC is beyond the UHC effective service coverage index, providing a comprehensive set of services (36, 46, 47). The UHC effective service coverage encompasses essential services or Health Benefit Packages (HBPs) prioritized for evaluation and inclusion within the UHC scheme (48) that have been developed based on certain criteria (49-52).

Globally, UHC effective service coverage index has been estimated using tracer indicators, which are derived from NCDs, infectious diseases, RMNCH, and service capacity & access (9, 53-58). Across different countries researchers have developed UHC monitoring indicators for specific country contexts. For example, governance, stewardship and financing, and palliative care are added indicators besides the fundamental tracers indicators in India (58). Similarly, sustainability of healthcare, need cost, health outcomes, enabling environment for benefitting from healthcare, quality of healthcare, and human resources for health are served as UHC monitoring indicators from supply-and demand-sides of health services (59).

Other fundamental issues for the question ‘Which services are covered?’ and ‘Which services are not covered?’ can be viewed from the services covered by health insurance. For example, in developed countries, eye services have been delivered as a component of UHC (60), while oral health care is not publicly covered (61, 62).

Financial protection matters about the amount that people pay to receive services. Financial protection mainly stands for insurance coverage or subsidized care. In this dimension, the UHC-related questions are: ‘who is covered (eligible population for and percentage of population covered by financial support)?’, ‘what is covered (service package covered and drugs covered by financial support)?’, and ‘how much is covered (per capita premium and government subsidy per capita)?’ (63). Financial coverage covers livelihood expenses, economic assistance, and reducing medical costs (47, 64). Financial protection and/or affordability are measured or monitored as part of UHC (56, 57). Globally utilized financial protection monitoring indicators, as part of UHC, include out-of-pocket (OOP) health spending, catastrophic health expenditure, impoverishment, and general financial hardship (9, 64). To illustrate, the percentage of households experienced CHE at the threshold of 10% or 25% of total expenditures or 40% of non-food expenditures, and impoverishment as it is percentage of households pushed into poverty by OOP (57, 65-69). It is also measured by the



poverty gap due to OOP payments, as described by average amount by which expenditures fall below the poverty line, for those impoverished (57, 68).

Population coverage, as parts of UHC, refers to who is covered for services and financial supports. Universal health coverage is designed to provide need based quality and affordable health services for all groups across the life course. Sometimes, population coverage reflects the coverage of services for specific age categories and vulnerable groups (47). For instance, the WHO and WB monitoring indicators shows that there are different indicators for groups of population and healthcare service types or diseases conditions. To illustrate, women of reproductive age (15–49 years) for family planning and antenatal care, infants for diphtheria-tetanus-pertussis containing vaccine, children under five years of age for care of suspected pneumonia, people living with HIV for antiretroviral therapy, population in malaria-endemic areas for insecticide-treated net access, households using at least basic sanitation facilities (all people live in the house), adults aged 30–79 years for prevalence of hypertension, and adults aged over 15 years for tobacco use (9). Similarly, GBD-19 estimate classified population coverage into six groups: women 15 to 49 years, newborns, children younger than 5 years, children and adolescents aged 5 to 19 years, adults aged 20 to 64, and older adults aged 65 years or older (54).

### How does universal health coverage work?

The common implementation mechanisms that support UHC include health insurance, a social health justice policy, digital financing systems, and partnerships (Table 1).

Table 1: The contexts, strategies, mechanisms, and outcomes in implementing UHC.

| Contexts and strategies |                         | Mechanisms                                                                                                                                                                                                                                             | Outcomes                        |
|-------------------------|-------------------------|--------------------------------------------------------------------------------------------------------------------------------------------------------------------------------------------------------------------------------------------------------|---------------------------------|
| Health system           | Primary health care     | <ul style="list-style-type: none"> <li>Effectiveness, comprehensiveness of care and interpersonal quality of care</li> <li>Positive discrimination against the underserved population</li> </ul>                                                       | UHC effective service coverage  |
|                         | Value-Based Health Care | <ul style="list-style-type: none"> <li>Skill mix</li> </ul>                                                                                                                                                                                            | UHC access and health outcome   |
|                         | Digital system          | <ul style="list-style-type: none"> <li>Make system more responsive.</li> <li>Enabling programs to implement changes based on client-proposed features.</li> <li>Improve access to care</li> <li>Improve diagnostics and resource allocation</li> </ul> | UHC: access and quality of care |

|                              |                                  |                                                                                                                                                                                                                                                                                                                          |                                    |
|------------------------------|----------------------------------|--------------------------------------------------------------------------------------------------------------------------------------------------------------------------------------------------------------------------------------------------------------------------------------------------------------------------|------------------------------------|
|                              | Health promotion                 | <ul style="list-style-type: none"> <li>• Reduce hospital admission.</li> <li>• Reduce demand for expensive health service</li> </ul>                                                                                                                                                                                     | Effective use of health resources  |
| Health insurance             | National health insurance        | <ul style="list-style-type: none"> <li>• Automatic coverage of all citizens via tax funds</li> <li>• Use of tax revenues to subsidise target populations, steps towards broader risk pools, and emphasis on purchasing services through demand-side financing mechanisms</li> </ul>                                      | UHC: access & Financial protection |
|                              | Private health insurance         | <ul style="list-style-type: none"> <li>• Provide subsidized care for privately registered clients</li> </ul>                                                                                                                                                                                                             | Prevent CHE                        |
|                              | Social health insurance          | <ul style="list-style-type: none"> <li>• Funded via income-based contributions that require tax-based revenue.</li> </ul>                                                                                                                                                                                                | Financial protection               |
| Social health justice policy | Social protection                | <ul style="list-style-type: none"> <li>• Employment to unemployed</li> <li>• Support the living cost.</li> <li>• Prevent poverty</li> <li>• Support people under the poverty line</li> </ul>                                                                                                                             | UHC: access & prevent CHE          |
| Partnership                  | Reciprocal health care agreement | <ul style="list-style-type: none"> <li>• Visitors access care without paying from their pocket</li> </ul>                                                                                                                                                                                                                | UHC: access & prevent CHE          |
|                              | (Inter)national partnership      | <ul style="list-style-type: none"> <li>• Expanding access to essential medicines and health products</li> <li>• Technology transfer</li> <li>• Develop an adequate health workforce</li> </ul>                                                                                                                           | UHC: access                        |
| Voluntary organizations      | Civil society                    | <ul style="list-style-type: none"> <li>• Connect with difficult-to-reach populations.</li> <li>• Achieve wider coverage and contribute to minimizing costs.</li> <li>• Supplementing government emergency aid response</li> <li>• Delivering necessary resources and supporting highly vulnerable populations</li> </ul> | Access and financial protection    |
| Private sector               | Private sector                   | <ul style="list-style-type: none"> <li>• Innovations for health care delivery</li> <li>• Networks for extending service coverage and access to medicines and other medical commodities and financial protection.</li> <li>• Transferring know-how for the maintenance and use of the equipment</li> </ul>                | UHC and health security            |

|                                          |                                                               |                                                                                                                                                                       |     |
|------------------------------------------|---------------------------------------------------------------|-----------------------------------------------------------------------------------------------------------------------------------------------------------------------|-----|
|                                          |                                                               | <ul style="list-style-type: none"> <li>• Pool different types of funding,</li> </ul>                                                                                  |     |
| Political interest                       | Consider as global public health and political agenda         | <ul style="list-style-type: none"> <li>• Declare UHC day</li> <li>• Use as election campaign</li> <li>• Consider in legislation and constitution documents</li> </ul> | UHC |
| Addressing social determinants of health | Governance index, stability index and socio-demographic index | <ul style="list-style-type: none"> <li>• Increased coverage of health service indicators</li> </ul>                                                                   | UHC |

**Healthcare insurance:** Providing financial support is a strategy to cover all people in need towards universal coverage and providing quality- and low-cost care to prevent catastrophic expenditure, impoverishment, and poverty (70, 71). Healthcare insurance has several forms, such as Medicaid and Medicare (72), social health insurance (72, 73), and private health insurance (74). To illustrate one by one, single-payer or national health insurance (e.g., Medicare) is a form of free government-owned healthcare provided to everyone, while citizen should pay for income tax revenue (72, 75-81). There are also mixed health plans, such as applying Medicare as a public health insurance and purchasing private hospital coverage or paying a tax surcharge as subsidized private care (82, 83). Social health insurance is funded via income-based contributions that require tax-based revenue, though its application may vary depending on countries (72, 73, 84). In developing countries, people voluntarily pay for health insurance as a prepayment so that they are exempted from paying medical costs, like initiatives of community-based health insurance scheme in Ethiopia (85) and Senegal (86). In some instance, insurance schemes have been implemented for specific groups of the population, such as National Disability Insurance Scheme in Australia (87).

**Social protection:** It expands service coverage and prevents financial protection (88, 89). For example, social health protection initiatives (Sehat Sahulat Program in India) enrol the poorest population and covers all secondary and limited tertiary services with a maximum Indian Rupee 540,000 expenditure limit per family per year (the government pays a premium of Indian Rupee 1549 per year per household to 3<sup>rd</sup> party), which ensures services through a mix of public-private providers (90). ‘Seguro popular’ is another example of social protection scheme that closes the gap in financial coverage and enhances comprehensive health service accessibility in Mexico (91).

**Value-Based Health Care:** It is a development of a health workforce with a mix of skills, and alternative funding models other than fee-for-service that initiated in Victoria, Australia aimed at reforming oral health care services (92, 93).

**Digital system (e.g., telemedicine and artificial intelligence):** It contributed to UHC by making the system more responsive, enabling programs to implement changes based on client-proposed features, and improving healthcare access, diagnostics, resource allocation, and quality of services (72, 94-97).

**Strengthening PHC:** PHC expenditure positively effects UHC with the involvement of the household and community, at which level PHC expands services and strategies (98-100). PHC strengthens the healthcare system, empowers the community, and provides multisectoral action and policy (101).

**Civil society:** It helps the health system to connect with difficult-to-reach or vulnerable populations, supplementing government emergency aid response, and delivering necessary resources (102-104).

**Private sector:** Private sector and community engagement alongside the public health sector creates and fosters efforts and mobilizes resources towards UHC, health security, and sustainable development goals (105, 106).

**Social innovation:** Social innovation facilitates achieving health through community co-learning, leadership, and accountability, providing the communities with respect and the opportunity to participate equally in creating and implementing programs by which communities were empowered, conceptualized, executed, monitored, and sustained the social innovation initiatives (107).

**Reciprocal health care agreement:** People, mainly visitors, from other countries are eligible to receive subsidized medical costs (108).

**Health promotion:** Health promotion, by itself, is part of UHC. In another way, it has the power to reduce hospital admission and healthcare costs, resulting in the effective use of health care resources (109).

**Partnership:** This is about with-in-a-nation and cross-nations partnerships. Partnership between government employers and consumer within a nation to strengthens infrastructure capacity and raise funds for UHC and provide better and comprehensive care towards

UHC(86, 110, 111). As a cross nations partnership, the partnership project between Thailand and Japan (112) and China-Africa health development initiatives (113) towards UHC can be examples.

**Political interest:** Universal health coverage is a global public health and political agenda. Pursuing of UHC is inherently a political process (4, 38, 114, 115). United Nations member states have strongly recommitted to achieving UHC (116), and have declared December 12<sup>th</sup> as UHC Day. They urge all stakeholders, from its Member States and organizations to civil society and individuals, to celebrate it yearly and promote UHC's importance (117). Universal health coverage has been utilized as a platform for a political election campaign. For instance, in India, the ruling centre-right government introduced the 'Pradhan Mantri Jan Arogya Yojana' reform shortly before the national election (118). The political attention garnered by UHC has led to a constitutional amendment in Mexico (119). The global movement towards UHC (120), the adoption of UHC as a policy reflecting legislative or executive commitment (121), and political motivation or commitment (106, 122-124) are among the motives for implementing UHC.

**Addressing social determinants of health:** Structural determinants, such as the governance index, stability index and socio-demographic index (125), and growth domestic product and health expenditure (126) are positively associated with UHC. Mothers' higher education status is a factor for increased coverage of health service indicators. In contrast, the higher number of children and elderly population in the households were potential risk factors for an increased risk of catastrophic and impoverishing health payment in Iraq (127). In general, the contexts, mechanisms, and outcomes underpinning the practice of UHC are presented in Table 1.

Presenting a country's experience with UHC is essential, particularly focusing on its implementation, the inclusivity of coverage, the extent of services, and the identification of those not covered. Additionally, understanding the supporting programs that enhance UHC in a specific country is vital. The readily available public information on UHC in Australia allows for straightforward incorporation as a case study in this realistic review. Australia's Medicare, a universal health insurance scheme, covers a wide range of services for citizens, permanent residents, and certain temporary residents. It includes hospital services, medical consultations, mental health services, some dental procedures, imaging, scans, pathology tests, eye tests, and medicines. However, it doesn't cover ambulance services, most dental

services, glasses, contact lenses, hearing devices, elective and cosmetic surgery, and services not on the Medicare Benefit Scheme list. It is funded through income tax, including the Medicare levy and surcharge (Supplementary file 3) (27).

### **Why Universal Health Coverage?**

There are multiple compelling reasons to advocate for UHC. The primary objective of UHC is to foster a healthier population by preventing diseases and mitigating their consequences. It offers protection against epidemics, disasters, and other health crises. Additionally, it contributes to advancing gender equality and human rights.

### **Mitigating burden of diseases**

Universal health coverage is instrumental in improving health outcomes, population health, and life-expectancy (128-131). For example, in south east Asia and the Western Pacific region, countries with a higher UHC scores experienced a significantly lower number of infected patients and deaths due to COVID-19 (132). A single-payer UHC system is estimated to save numerous lives in the USA (133). Additionally, a significant relationship was observed between the UHC effective service coverage index and the burden of emergency diseases, substantially reducing disability-adjusted life years of emergency medical conditions (134). Implementing UHC can also prevent antimicrobial resistance by reducing self-medication (135).

### **Achieving equity**

Universal health coverage focuses on equity, aiming to reach the left behind individuals (136, 137). The UHC approach expands essential healthcare services to the poorest (138, 139), through which health equity can be achieved (140-143). Universal health coverage is also linked with other sustainable development goals, exemplified by the call for UHC action to address gender inequities (144). Social determinants of health and UHC have a bidirectional relationship.

### **Health security**

Universal health coverage contributes substantially to global health security (GHS). Global health security and UHC share common goals of preventing risk and fostering human rights, underscored by shared indicators such as health security, access to medicines, health workforce, and financial protection (145). Global health security and UHC synergies support effective pandemic preparedness and response (146). Both global health strategies have

influenced each other. Universal health coverage indices, particularly maternal and child health and infectious diseases indicators correlated with global health security (147). Earthquakes adversely affected women's access to quality essential health services, reflecting the influence of GHS on UHC (148). Furthermore, international health regulation core capacity scores were associated with the UHC service coverage index (149).

## **Discussions**

In this realistic review, we explored and synthesised what, why, and how of UHC. In our analysis, we observed that the UHC has been utilized as a policy, process, and target to improve health. Universal health coverage comprises a collection of legal and social ideas whose foundation is laid by (inter)national organizations with the involvement of stakeholders. Likewise, the broad context of UHC addresses the needs of individuals based on the national and global agreements. It is acceptable to stakeholders and beneficiaries due to its responsive values such as human rights, equity, justice, and quality. Hence, UHC fulfils health policy's features, like relevance, acceptability, effectiveness, efficiency, and equity. In the context of service provision process, UHC conceptualized as providing a range of health services to achieve a planned national and global target embedded with several non-mutually exclusive interdependent tasks. The United Nations member states aspire to UHC through the interaction between health, finance, economic, social, and political sectors. This implies a multisector interaction and agreement manifested by overt actions passing through a process. The actions in the processes are activities on equity in access, verifying human rights and justice, and ensuring financial protection, leading to maximizing UHC's effective service coverage and financial protection index. These indices are the targets that are not an overnight task; instead, they require implementing activities and strategies for more than 15 years as planned globally. As a target, the UHC effective service coverage and financial protection index have varied across countries because different countries may adopt various approaches depending on their context and need, indicating the contexts may be varied in implementation.

Health insurance is a prominent context-based strategy every country needs to achieve UHC. Its immediate and proximal benefits are to protect an individual from financial catastrophe due to health care utilization costs and ultimately reduce CHE, poverty due to OOP expenditure, and impoverishment. The financial protection principle does not mean healthcare should be free of charge; instead, it addresses what charges patients should incur

for using the services. Various types of health insurance across countries may differ based on the mechanisms of payment system for health care, the proportion of cost covered by direct pocket from patients and government, and the extent of coverage. Different health care models have been adopted based on the costs covered for health care services. For example, the Beveridge model provides health care for all citizens and is financed by the government through tax payments. This model is applied in Great Britain, Spain, and New Zealand (150). Similarly, national public health insurance has been implemented in Australia. As of January 2024, all health care services except dental services for adults and theatre and hotel reservations from private health care services were covered in Australia (27).

In contrast, in a less developed country, such as Ethiopia, voluntary community-based health insurance (CBHI) (annual prepayment by people as a membership) and social health insurance (3% of the gross salary paid by volunteer employees and pensioners for themselves and their families) are the main options. In both insurance schemes, in Ethiopia, there were no clear directions about the services covered and not covered and the percentage of costs covered by patients and insurance schemes, except that it was described that essential health care services were covered based on the agreement and that the cost of health services for any beneficiary who used the health service without following the referral system would not be covered by the CBHI (151, 152). It is reported that appropriate government health expenditure have achieved a better reduction of infant mortality and an increase in the population's life-expectancy (153), and the implementation of public insurance coverage has led to an increase in inpatient and outpatient care utilization (154). Health insurance-related moral behaviour should be carefully monitored because UHC in Indonesia has been associated with increased unnecessary admissions and readmissions (155).

Another macro context that affects UHC is partnership, which refers to the broader political, policy and cultural environment that influences how partnerships are formed, governed, and implemented. The partnership can create opportunities for UHC's progress. For example, China has made remarkable contributions to Africa's health development by building public health facilities and systems, enhancing basic medical service capacity, and improving human resources for medical services (156). Reciprocal health care is a form of partnership between countries as an international agreement. For example, Australia has reciprocal health care agreements with 11 countries that enable many Australian travellers to access health care in



other countries without paying out of pocket (157, 158). A public-private sector partnership is another way by which the UHC can be achieved, although it needs careful considerations that particularly involve the private-for-profit sector in the provision of health services due to their urban-biased distribution and the quality and pricing of their services (159).

On the other hand, the public sector sometimes neglects the availability and provision of some services that the private sector does, like basic obstetric and emergency care is neglected in the public sector (160). Thus, public-private partnership creates synergies of power and complement each other. Moreover, a global partnership not always practical if each member's interest deviates from the common agenda (161), ministries have weak ownership of policy dialogue, and stakeholders lack of confidence in their capacity for joint action (162). Overall, a partnership might consider the national and local objectives, legal and regulatory systems, financial and accountability arrangements, influence and interests of various stakeholders, and values and norms that influence collaborative work.

In general, there have been several strategies that directly foster UHC, or some that have mutual interaction with UHC. For instance, value-based health care is among the strategies rarely presented in supporting UHC implementation. On the other hand, UHC can improve the implementation of value-based health care. It is understandable that the ultimate goal of value-based health care is to achieve health outcomes, improve client experiences of healthcare, and reduce costs to healthcare systems by reshuffling the existing service provision pathways (163). The interdependent pillars of value-based health care include 'Organize into integrated practice units', 'measure outcomes and costs for every client', 'move to bundled payment for care cycles', 'integrate care delivery across separate facilities', 'expand excellent services across geography', and 'build an enabling information technology platform' (164). Literally, both intersect on the pillars of health outcomes, healthcare costs, and expanding services. This denotes that activities to enhance these would serve a twofold purpose: improving both value-based healthcare and UHC.

The ultimate reason why UHC has gained a place on the global stage and in each country's national plan is to create a healthier society. Regarding the political economy of UHC, it is a political interest driven by various social forces to create public programmes or regulations that expand access to care, improve equity, and pool financial risks (38). Unless properly managed, the political context, on the other hand, can hinder the financing of surgical care for children (115). Moreover, social determinants of health and UHC have a bidirectional

relationship. Addressing the challenges related to social classes can enhance progress towards UHC. Conversely, UHC is essential to addressing social determinants of health, improving health security, mitigating the consequences of health problems, and achieving health equity. The progress towards UHC can address the conditions in which people are born, grow, live, and conduct daily life, targeting social determinants of health (137).

### **Limitation of this review**

The review included only articles published in English.

### **Conclusions**

Universal health coverage is a multifaceted concept that can be expressed by various terms depending on the context and perspective. UHC is a political and ethical imperative that aims to promote health equity and protect human dignity across different sectors and levels of society. Practically, UHC is not truly universal, as it does not include all services under its scheme and varies across countries. Investing in and implementing the various mechanisms that can facilitate UHC for all is imperative. Due to political supremacy, preventing diseases and mitigating their effects, addressing socioeconomic determinants of health to attain equity, and serving a crucial role in global health security, universal health coverage is essential for all nations.

**Acknowledgements:** Not applicable

**Contributors:** AE & YA conceptualised the project. AE analysed the data, wrote the first draft and conducted subsequent revisions. YA supervised the whole research process, checked data and edition of the manuscript, and revised the manuscript. TSM, RBK, DE, EW, AZ provided subsequent comments and revisions. AE, TSM, RBK, DE, EW, AZ, and YA approved the final manuscript.

**Funding:** The authors have not declared a specific grant for this research from any funding agency in the public, commercial or not-for-profit sectors.

**Competing interests:** None declared.

**Patient and public involvement:** Patients and/or the public were not involved in the design, or conduct, or reporting, or dissemination plans of this research.

**Patient consent for publication:** Not required.

**Ethics approval:** Not applicable because the data sources for this research were publicly available articles.

**Data availability:** All the required data are available within this manuscript and the supplementary files.

## References

1. Merriam-Webster Dictionary. Universal [Available from: <https://www.merriam-webster.com/dictionary/universal>].
2. World Health Organization. World Health Organisation definition of health. 2011.
3. Merriam-Webster Dictionary.

## Coverage

[Available from: <https://www.merriam-webster.com/dictionary/coverage>].

4. Smithers D, Waitzkin H. Universal health coverage as hegemonic health policy in low-and middle-income countries: A mixed-methods analysis. *Social Science & Medicine*. 2022;302:114961.
5. World Health Organization. SEA/RC32/15-Strategies for health for all by the year 2000. 1979.
6. Gaude GS. WHO Millennium development goals and achievements so far. *Medknow*; 2014. p. 65-9.
7. World Health Organization. World Bank and WHO: Half the world lacks access to essential health services, 100 million still pushed into extreme poverty because of health expenses 2023 [Available from: <https://www.who.int/news/item/13-12-2017-world-bank-and-who-half-the-world-lacks-access-to-essential-health-services-100-million-still-pushed-into-extreme-poverty-because-of-health-expenses>].
8. World Health Organization. Universal Health Coverage (UHC) 2023 [updated 5 October 2023. Available from: [https://www.who.int/news-room/fact-sheets/detail/universal-health-coverage-\(uhc\)](https://www.who.int/news-room/fact-sheets/detail/universal-health-coverage-(uhc))].
9. World Health Organization and World Bank. Tracking universal health coverage: 2023 global monitoring report. Geneva: World Health Organization and International Bank for Reconstruction and Development / The World Bank; 2023. Licence: CC BY-NC-SA 3.0 IGO.
10. Kalita A, Carton-Rossen N, Joseph L, Chhetri D, Patel V. The Barriers to Universal Health Coverage in India and the Strategies to Address Them: A Key Informant Study. *Annals of Global Health*. 2023;89(1).
11. Chen S, Cao Z, Wang Z, Wang C. The challenging road to universal health coverage. *The Lancet Global Health*. 2023;11(10):e1490-e1.
12. Endalamaw A, Gilks CF, Ambaw F, Assefa Y. Universality of universal health coverage: A scoping review. *Plos one*. 2022;17(8):e0269507.
13. Horton R. Offline: UHC—one promise and two misunderstandings. *The Lancet*. 2018;391(10128):1342.
14. Ataguba JE, Kabaniha GA. Characterizing key misconceptions of equity in health financing for universal health coverage. *Health Policy and Planning*. 2022;37(7):928-31.
15. Oraro-Lawrence T, Wyss K. Policy levers and priority-setting in universal health coverage: a qualitative analysis of healthcare financing agenda setting in Kenya. *BMC health services research*. 2020;20:1-11.
16. Assan A, Takian A, Aikins M, Akbarisari A. Challenges to achieving universal health coverage through community-based health planning and services delivery approach: a qualitative study in Ghana. *BMJ open*. 2019;9(2):e024845.

17. UHC2030. All hands on deck – mobilizing private sector contribution to accelerate progress towards universal health coverage [updated 2023; cited 2023 November 18]. Available from: <https://www.uhc2030.org/news-and-events/blog/all-hands-on-deck-mobilizing-private-sector-contribution-to-accelerate-progress-towards-universal-health-coverage/>.
18. Horton R, Das P. Universal health coverage: not why, what, or when—but how? *The Lancet*. 2015;385(9974):1156-7.
19. Koochpayehzadeh J, Azami-Aghdash S, Derakhshani N, Rezapour A, Kalajahi RA, Khasraghi JS, et al. Best practices in achieving universal health coverage: a scoping review. *Medical Journal of the Islamic Republic of Iran*. 2021;35.
20. Jebeli SSH, Rezapour A, Rosenberg M, Moradi-Lakeh M. Measuring universal health coverage to ensure continuing care for older people: a scoping review with specific implications for the Iranian context. *Eastern Mediterranean Health Journal*. 2021;27(8):806-17.
21. Van Niekerk S-M, Inglis-Jassiem G, Kamalakannan S, Fernandes S, Webster J, English R, et al. Achieving universal health coverage for people with stroke in South Africa: protocol for a scoping review. *BMJ open*. 2020;10(10):e041221.
22. Pawson R, Greenhalgh T, Harvey G, Walshe K. Realist review—a new method of systematic review designed for complex policy interventions. *Journal of health services research & policy*. 2005;10(1\_suppl):21-34.
23. Hinds K, Dickson K. Realist synthesis: a critique and an alternative. *Journal of Critical Realism*. 2021;20(1):1-17.
24. Jagosh J. Realist synthesis for public health: building an ontologically deep understanding of how programs work, for whom, and in which contexts. *Annual Review of Public Health*. 2019;40:361-72.
25. Cerf ME. Health research, development and innovation capacity building, enhancement and sustainability. *Discover Social Science and Health*. 2023;3(1):18.
26. World Health Organization. *Health Systems Financing: The Path to Universal Coverage*; The World Health Report; World Health Organization: Geneva, Switzerland, 2010.
27. Australian Government. *Services Australia: Medicare and tax Australia* [updated 27 April 2023; cited 2023 January 02]. Available from: <https://www.servicesaustralia.gov.au/medicare-and-tax?context=60092>.
28. Davis K. Universal coverage in the United States: lessons from experience of the 20th century. *Journal of Urban Health*. 2001;78:46-58.
29. Pan American Health Organization & World Health Organization. *Universal Health Day 2022* [Available from: <https://www.paho.org/en/campaigns/universal-health-day-2022>].
30. Haakenstad A, Yearwood JA, Fullman N, Bintz C, Bienhoff K, Weaver MR, et al. Assessing performance of the Healthcare Access and Quality Index, overall and by select age groups, for 204 countries and territories, 1990–2019: a systematic analysis from the Global Burden of Disease Study 2019. *The Lancet global health*. 2022;10(12):e1715-e43.
31. Luankongsomchit V, Boonma C, Soboon B, Ranron P, Isaranuwatthai W, Pimsarn N, et al., editors. *How Many People Experience Unsafe Medical Care in Thailand, and How Much Does It Cost under Universal Coverage Scheme?* Healthcare; 2023: MDPI.
32. Hui C. Undetectable= Untransmittable= Universal Access (U= U= U): transforming a foundational, community-led HIV/AIDS health informational advocacy campaign into a global HIV/AIDS health equity strategy and policy priority. *Sexual Health*. 2023.
33. Traynor K. *IOM calls for universal health care coverage by 2010*. Oxford University Press; 2004.
34. Eastman P. *IOM calls for universal health insurance by 2010*. *Emergency Medicine News*. 2004;26(4):1-6.
35. McIntyre D, Garshong B, Mtei G, Meheus F, Thiede M, Akazili J, et al. Beyond fragmentation and towards universal coverage: insights from Ghana, South Africa and the United Republic of Tanzania. *Bulletin of the World health Organization*. 2008;86:871-6.

36. Naidoo S, Mahomed O, Govender D, Gunda R, Lutge E, Moodley N, et al. Operational manager's knowledge and attitudes toward data and universal health coverage indicators in primary health clinics in Ugu, South Africa. *Global Public Health*. 2023;18(1):2227882.
37. Beattie A, Yates R, Noble DJ. Accelerating progress towards universal health coverage in Asia and Pacific: improving the future for women and children. *BMJ global health*. 2016;1(Suppl 2):i12.
38. Savedoff WD, de Ferranti D, Smith AL, Fan V. Political and economic aspects of the transition to universal health coverage. *The Lancet*. 2012;380(9845):924-32.
39. Sukmanee J, Butchon R, Karunayawong P, Dabak SV, Isaranuwachai W, Teerawattananon Y. The impact of universal health coverage and COVID-19 pandemic on out-of-pocket expenses in Thailand: an analysis of household survey from 1994 to 2021. *Expert Review of Pharmacoeconomics & Outcomes Research*. 2023:1-8.
40. Abihiro GA, De Allegri M. Universal health coverage from multiple perspectives: a synthesis of conceptual literature and global debates. *BMC international health and human rights*. 2015;15:1-7.
41. Wagstaff A, Cotlear D, Eozenou PH-V, Buisman LR. Measuring progress towards universal health coverage: with an application to 24 developing countries. *Oxford Review of Economic Policy*. 2016;32(1):147-89.
42. The Lancet Public Health. Universal Health Coverage: realistic and achievable? 2019. p. e1.
43. Muinde JVS, Prince RJ. A new universalism? Universal health coverage and debates about rights, solidarity and inequality in Kenya. *Social Science & Medicine*. 2023;319:115258.
44. Stevens A, Neilson M, Rasanathan K, Syed SB, Koller TS. Quality and equity: a shared agenda for universal health coverage. *BMJ Global Health*. 2023;8(7):e012561.
45. Ng M, Fullman N, Dieleman JL, Flaxman AD, Murray CJ, Lim SS. Effective coverage: a metric for monitoring universal health coverage. *PLoS medicine*. 2014;11(9):e1001730.
46. Chapman AR. Monitoring universal health coverage within the Sustainable Development Goals: assessing the indicators proposed by Daniel Hogan, Gretchen Stevens, Ahmad Reza Hosseinpoor, and Ties Boerma. *Journal of Hospital Management and Health Policy*. 2018;2.
47. Sanadgol A, Doshmangir L, Khodayari-Zarnaq R, Sergeevich Gordeev V. Role of non-governmental organizations in moving toward universal health coverage: A case study in Iran. *Frontiers in Public Health*. 2022;10:985079.
48. Glassman A, Giedion U, Sakuma Y, Smith PC. Defining a health benefits package: what are the necessary processes? *Health Systems & Reform*. 2016;2(1):39-50.
49. World Health Organization. Principles of health benefit packages. Geneva: World Health Organization; 2021. Licence: CC BY-NC-SA 3.0 IGO.
50. Mangoya D, Barham L, Moyo E, Moyo P, Dzinamarira T. The Use of Economic Evaluation Tools in Essential Health Benefits Package Selection for Universal Health Coverage. *Value in Health Regional Issues*. 2023;36:1-9.
51. Eregata GT, Hailu A, Geletu ZA, Memirie ST, Johansson KA, Stenberg K, et al. Revision of the Ethiopian essential health service package: an explication of the process and methods used. *Health Systems & Reform*. 2020;6(1):e1829313.
52. Ochalek J, Revill P, Manthalu G, McGuire F, Nkhoma D, Rollinger A, et al. Supporting the development of a health benefits package in Malawi. *BMJ global health*. 2018;3(2):e000607.
53. Hogan DR, Stevens GA, Hosseinpoor AR, Boerma T. Monitoring universal health coverage within the Sustainable Development Goals: development and baseline data for an index of essential health services. *The Lancet Global Health*. 2018;6(2):e152-e68.
54. Lozano R, Fullman N, Mumford JE, Kivimäki M, Meretoja A, Meretoja TJ, et al. Measuring universal health coverage based on an index of effective coverage of health services in 204 countries and territories, 1990-2019: a systematic analysis for the global burden of disease study 2019. 2020.
55. Mchenga M, Manthalu G, Chingwanda A, Chirwa E. Developing Malawi's Universal Health Coverage Index. *Frontiers in Health Services*. 2022;1:786186.
56. Liu X, Wang Z, Zhang H, Meng Q. Measuring and evaluating progress towards Universal Health Coverage in China. *Journal of global health*. 2021;11.

57. Li Y, Zhang C, Zhan P, Fu H, Yip W. Trends and projections of universal health coverage indicators in China, 1993–2030: An analysis of data from four nationwide household surveys. *The Lancet Regional Health–Western Pacific*. 2023;31.
58. Nambiar D, Sankar D H, Negi J, Nair A, Sadanandan R. Monitoring universal health coverage reforms in primary health care facilities: creating a framework, selecting and field-testing indicators in Kerala, India. *PloS one*. 2020;15(8):e0236169.
59. Reddock J. Seven parameters for evaluating universal health coverage: including supply-and-demand perspectives. *International Journal of Healthcare Management*. 2017;10(3):207-18.
60. Goodman L, Hamm L, Tousignant B, Black J, Misra S, Woodburn S, et al. Primary eye health services for older adults as a component of universal health coverage: a scoping review of evidence from high income countries. *The Lancet Regional Health–Western Pacific*. 2023;35.
61. Winkelmann J, Listl S, van Ginneken E, Vassallo P, Benzi H. Universal health coverage cannot be universal without oral health. *The Lancet Public Health*. 2023;8(1):e8-e10.
62. Mathur M, Williams D, Reddy K, Watt R. Universal health coverage: a unique policy opportunity for oral health. SAGE Publications Sage CA: Los Angeles, CA; 2015. p. 3S-5S.
63. Tao W, Zeng Z, Dang H, Li P, Chuong L, Yue D, et al. Towards universal health coverage: achievements and challenges of 10 years of healthcare reform in China. *BMJ global health*. 2020;5(3):e002087.
64. Arhin K, Oteng-Abayie EF, Novignon J. Assessing the efficiency of health systems in achieving the universal health coverage goal: evidence from Sub-Saharan Africa. *Health Economics Review*. 2023;13(1):1-16.
65. Kaiser AH, Okorafor O, Ekman B, Chhim S, Yem S, Sundewall J. Assessing progress towards universal health coverage in Cambodia: Evidence using survey data from 2009 to 2019. *Social Science & Medicine*. 2023;321:115792.
66. Okoroh J, Sarpong DO-B, Essoun S, Riviello R, Harris H, Weissman JS. Does insurance protect individuals from catastrophic payments for surgical care? An analysis of Ghana’s National Health Insurance Scheme at Korle-Bu teaching Hospital. *BMC health services research*. 2020;20:1-11.
67. Stewart BT, Gyedu A, Goodman SK, Boakye G, Scott JW, Donkor P, et al. Injured and broke: The impacts of the Ghana National Health Insurance Scheme (NHIS) on service delivery and catastrophic health expenditure among seriously injured children. *African journal of emergency medicine*. 2021;11(1):144-51.
68. Haas S, Hatt L, Leegwater A, El-Khoury M, Wong W. Indicators for measuring universal health coverage: a five-country analysis (draft). Bethesda, MD: Health Systems. 2012;20:20.
69. Saksena P, Hsu J, Evans DB. Financial risk protection and universal health coverage: evidence and measurement challenges. *PLoS medicine*. 2014;11(9):e1001701.
70. Shaikh BT, Ali N. Universal health coverage in Pakistan: is the health system geared up to take on the challenge? *Globalization and Health*. 2023;19(1):4.
71. Lagomarsino G, Garabrant A, Adyas A, Muga R, Otoo N. Moving towards universal health coverage: health insurance reforms in nine developing countries in Africa and Asia. *The Lancet*. 2012;380(9845):933-43.
72. Iqbal MH. Disparities of health service for the poor in the coastal area: does Universal health coverage reduce disparities? *Journal of Market Access & Health Policy*. 2019;7(1):1575683.
73. Fang H, Eggleston K, Hanson K, Wu M. Enhancing financial protection under China’s social health insurance to achieve universal health coverage. *bmj*. 2019;365.
74. Luo Y, Shi Z, Guo D, He P. Toward universal health coverage: regional inequalities and potential solutions for alleviating catastrophic health expenditure in the post-poverty elimination era of China. *International Journal of Health Policy and Management*. 2023;12.
75. Donnelly PD, Erwin PC, Fox DM, Grogan C. Single-payer, multiple-payer, and state-based financing of health care: Introduction to the special section. *American journal of public health*. 2019;109(11):1482.

76. Fox A, Poirier R. How single-payer stacks up: evaluating different models of universal health coverage on cost, access, and quality. *International Journal of Health Services*. 2018;48(3):568-85.
77. McKee M. Canada's Single-payer Health Care System. *JAMA*. 2019;322(19):1922-.
78. Ivers N, Brown AD, Detsky AS. Lessons from the Canadian experience with single-payer health insurance: just comfortable enough with the status quo. *JAMA internal medicine*. 2018;178(9):1250-5.
79. Kuo L-w, Fu C-Y, Liao C-A, Liao C-H, Hsieh C-H, Wang S-Y, et al. Inequality of trauma care under a single-payer universal coverage system in Taiwan: a nationwide cohort study from the National Health Insurance Research Database. *BMJ open*. 2019;9(11):e032062.
80. Cashin C, Dossou J-P. Can National health insurance pave the way to universal health coverage in sub-Saharan Africa? *Health Systems & Reform*. 2021;7(1):e2006122.
81. Ipinnimo T, Omotoso A, Bamidele T, Sanni T, Ibirongbe D, Ipinnimo M, et al. Comparing the Nigeria National Health Insurance Scheme Act, 2004 and the National Health Insurance Authority Act, 2022-What is New and its Implications for the Health System. *West African Journal of Medicine*. 2023;40(5):525-32.
82. Angeles MR, Crosland P, Hensher M. Challenges for Medicare and universal health care in Australia since 2000. *Med J Aust*. 2023;218(7).
83. Dobrosak C, Dugdale P. Issues for reregulation of private hospital insurance in Australia. *Australian Health Review*. 2021;45(3):290-6.
84. World Health Organization. World health assembly resolution 58.33. Sustainable health financing, universal coverage and social health insurance. Geneva: World Health Organization; 2005.
85. Merga BT, Balis B, Bekele H, Fekadu G. Health insurance coverage in Ethiopia: financial protection in the Era of sustainable development goals (SDGs). *Health Economics Review*. 2022;12(1):43.
86. Wood A. Patronage, partnership, voluntarism: Community-based health insurance and the improvisation of universal health coverage in Senegal. *Social Science & Medicine*. 2023;319:115491.
87. Gilroy J, Veli-Gold S, Wright W, Dew A, Jensen H, Bulkeley K, et al. Disability workforce and the NDIS planning process in regional, rural and remote regions of Australia: Scoping review. *Australian Journal of Rural Health*. 2023.
88. Yokobori Y, Kiyohara H, Mulati N, Lwin KS, Bao TQQ, Aung MN, et al. Roles of Social Protection to Promote Health Service Coverage among Vulnerable People toward Achieving Universal Health Coverage: A Literature Review of International Organizations. *International Journal of Environmental Research and Public Health*. 2023;20(9):5754.
89. Hasan SS, Mustafa ZU, Kow CS, Merchant HA. "Sehat Sahulat Program": A Leap into the Universal Health Coverage in Pakistan. *International Journal of Environmental Research and Public Health*. 2022;19(12):6998.
90. Ayub A, Khan RS, Khan SA, Hussain H, Tabassum A, Shehzad JA, et al. Progress of Khyber Pakhtunkhwa (Pakistan) towards universal health coverage. *Journal of Ayub Medical College Abbottabad*. 2018;30(3):481-4.
91. Knaul FM, González-Pier E, Gómez-Dantés O, García-Junco D, Arreola-Ornelas H, Barraza-Lloréns M, et al. The quest for universal health coverage: achieving social protection for all in Mexico. *The Lancet*. 2012;380(9849):1259-79.
92. Nguyen TM, Bridge G, Hall M, Theodore K, Lin C, Scully B, et al. Is value-based healthcare a strategy to achieve universal health coverage that includes oral health? An Australian case study. *Journal of Public Health Policy*. 2023:1-15.
93. Dohmen P, De Sanctis T, Waiyaiya E, Janssens W, de Wit TFR, Spieker N, et al. Implementing a Comprehensive Value-based Healthcare System to Improve Pregnancy and Childbirth Outcomes in Urban and Rural Kenya. 2021.
94. Wilson DR, Haas S, Van Gelder S, Hitimana R. Digital financial services for health in support of universal health coverage: qualitative programmatic case studies from Kenya and Rwanda. *BMC Health Services Research*. 2023;23(1):1036.

95. van de Vijver S, Tensen P, Asiki G, Requena-Méndez A, Heidenrijk M, Stronks K, et al. Digital health for all: How digital health could reduce inequality and increase universal health coverage. *Digital health*. 2023;9:20552076231185434.
96. Bold B, Lkhagvajav Z, Dorjsuren B. Role of artificial intelligence in achieving universal health coverage: a Mongolian perspective. *Korean Journal of Radiology*. 2023;24(9):821.
97. Martinez-Millana A, Saez-Saez A, Tornero-Costa R, Azzopardi-Muscat N, Traver V, Novillo-Ortiz D. Artificial intelligence and its impact on the domains of universal health coverage, health emergencies and health promotion: An overview of systematic reviews. *International Journal of Medical Informatics*. 2022;166:104855.
98. Arhin K, Frimpong AO, Acheampong K. Effect of Primary Health Care Expenditure on Universal Health Coverage: Evidence from Sub-Saharan Africa. *ClinicoEconomics and Outcomes Research*. 2022:643-52.
99. Van Weel C, Kidd MR. Why strengthening primary health care is essential to achieving universal health coverage. *Cmaj*. 2018;190(15):E463-E6.
100. Sacks E, Schleiff M, Were M, Chowdhury AM, Perry HB. Communities, universal health coverage and primary health care. *Bulletin of the World Health Organization*. 2020;98(11):773.
101. Assefa Y, Hill PS, Gilks CF, Admassu M, Tesfaye D, Van Damme W. Primary health care contributions to universal health coverage, Ethiopia. *Bulletin of the World Health Organization*. 2020;98(12):894.
102. Hossain AD, Nakalule M, Venkataraman S, Guillaume Y, Mohareb AM, Wandera DN, et al. Revisiting the role of civil society in responses to infectious disease outbreaks: a proposed framework and lessons from a COVID-19 vaccine equity coalition in Uganda. *BMJ Global Health*. 2023;8(6):e012510.
103. Jayaraman A, Fernandez A. Role of civil society in health care: Mechanisms for realizing universal health coverage in vulnerable communities of India. *Frontiers in Public Health*. 2023;11:1091533.
104. Levine AC, Park A, Adhikari A, Alejandria MCP, Bradlow BH, Lopez-Portillo MF, et al. The role of civil society organizations (CSOs) in the COVID-19 response across the Global South: A multinational, qualitative study. *PLOS Global Public Health*. 2023;3(9):e0002341.
105. Olu O, Drameh-Avognon P, Asamoah-Odei E, Kasolo F, Valdez T, Kabaniha G, et al., editors. Community participation and private sector engagement are fundamental to achieving universal health coverage and health security in Africa: reflections from the second Africa health forum. *BMC proceedings*; 2019: BioMed Central.
106. Eusebio C, Bakola M, Stuckler D. How to Achieve Universal Health Coverage: A Case Study of Uganda Using the Political Process Model: Comment on "Health Coverage and Financial Protection in Uganda: A Political Economy Perspective". *International Journal of Health Policy and Management*. 2023;12.
107. Van Niekerk L, Bautista-Gomez MM, Msiska BK, Mier-Alpaño JDB, Ongkeko Jr AM, Manderson L. Social innovation in health: strengthening Community Systems for Universal Health Coverage in rural areas. *BMC Public Health*. 2023;23(1):55.
108. Short SD, Lee H-Y, Lee M-J, Park E, Purwaningrum F. The case for a reciprocal health care agreement between Australia and South Korea. *Asia Pacific Journal of Health Management*. 2021;16(1):21-7.
109. Shilton T, Barry MM. The critical role of health promotion for effective universal health coverage. *Global Health Promotion*. 2022;29(1):92-5.
110. Stern A. An American partnership for universal coverage. *Health Affairs*. 2008;27(3):686-7.
111. Kurniati A, Roskam E, Afzal M, Suryowinoto T, Mukti A. Strengthening Indonesia's health workforce through partnerships. *Public health*. 2015;129(9):1138-49.
112. Machida M, Miyashita Y. For further collaboration on strengthening Universal Health Coverage (UHC): Partnership project between Japan and Thailand. *Global health & medicine*. 2021;3(1):11-4.



113. Tambo E, Tang S, Ai L, Zhou X-N. The value of China-Africa health development initiatives in strengthening “One Health” strategy. *Global Health Journal*. 2017;1(1):33-46.
114. Chemouni B. The political path to universal health coverage: power, ideas and community-based health insurance in Rwanda. *World Development*. 2018;106:87-98.
115. Landrum KR, Hall BJ, Smith ER, Flores W, Lou-Meda R, Rice HE. Challenges with pediatric surgical financing and universal health coverage in Guatemala: A qualitative analysis. *PLOS Global Public Health*. 2022;2(9):e0000220.
116. United Nations. Political declaration of the high-level meeting on universal health coverage: moving together to build a healthier world. 2019.
117. United Nations General Assembly. Resolution adopted by the General Assembly on 12 December 2017: A/RES/72/138. 2018.
118. Srivastava S, Bertone MP, Parmar D, Walsh C, De Allegri M. The genesis of the PM-JAY health insurance scheme in India: technical and political elements influencing a national reform towards universal health coverage. *Health policy and planning*. 2023;38(7):862-75.
119. Meneses Navarro S, Pelcastre-Villafuerte BE, Becerril-Montekio V, Serván-Mori E. Overcoming the health systems' segmentation to achieve universal health coverage in Mexico. *The International Journal of Health Planning and Management*. 2022;37(6):3357-64.
120. Tediosi F, Finch A, Procacci C, Marten R, Missoni E. BRICS countries and the global movement for universal health coverage. *Health policy and planning*. 2016;31(6):717-28.
121. UNICEF. National health insurance in Asia and Africa: advancing equitable social health protection to achieve universal health coverage. New York: UNICEF. 2012.
122. Venkateswaran S, Slaria S, Mukherjee S. Political motivation as a key driver for universal health coverage. *Frontiers in Public Health*. 2022:3707.
123. Mao W, Tang Y, Tran T, Pender M, Khanh PN, Tang S. Advancing universal health coverage in China and Vietnam: lessons for other countries. *BMC Public Health*. 2020;20:1-9.
124. Greer SL, Méndez CA. Universal health coverage: a political struggle and governance challenge. *American journal of public health*. 2015;105(S5):S637-S9.
125. Ranabhat CL, Jakovljevic M, Dhimal M, Kim C-B. Structural factors responsible for universal health coverage in low-and middle-income countries: results from 118 countries. *Frontiers in public health*. 2020;7:414.
126. Takura T, Miura H. Socioeconomic determinants of universal health coverage in the Asian region. *International journal of environmental research and public health*. 2022;19(4):2376.
127. Taniguchi H, Rahman MM, Swe KT, Islam MR, Rahman MS, Parsell N, et al. Equity and determinants in universal health coverage indicators in Iraq, 2000–2030: a national and subnational study. *International journal for equity in health*. 2021;20:1-10.
128. Moreno-Serra R, Smith PC. Does progress towards universal health coverage improve population health? *The Lancet*. 2012;380(9845):917-23.
129. Yuki M. Universal Health Coverage and Health Outcomes-Final Report. OECD. 2016.
130. Ranabhat CL, Atkinson J, Park M-B, Kim C-B, Jakovljevic M. The influence of universal health coverage on life expectancy at birth (LEAB) and healthy life expectancy (HALE): a multi-country cross-sectional study. *Frontiers in pharmacology*. 2018;9:960.
131. Kruk ME, Gage AD, Joseph NT, Danaei G, García-Saisó S, Salomon JA. Mortality due to low-quality health systems in the universal health coverage era: a systematic analysis of amenable deaths in 137 countries. *The Lancet*. 2018;392(10160):2203-12.
132. Saengtabtim K, Tang J, Leelawat N, Egawa S, Suppasri A, Imamura F. Universal health coverage mitigated COVID-19 health-related consequences in Asia Oceania. *International Journal of Disaster Risk Reduction*. 2023;92:103725.
133. Galvani AP, Parpia AS, Pandey A, Sah P, Colón K, Friedman G, et al. Universal healthcare as pandemic preparedness: the lives and costs that could have been saved during the COVID-19 pandemic. *Proceedings of the National Academy of Sciences*. 2022;119(25):e2200536119.

134. Hajjar K, Lillo L, Martinez DA, Hermosilla M, Risko N. Association between universal health coverage and the disease burden of acute illness and injury at the global level. *BMC Public Health*. 2023;23(1):1-7.
135. Imran L, Rehan ST, Lee KY. How Universal Health Coverage can curb the escalating antimicrobial resistance in Pakistan: a call to action for the country's healthcare system. *Tropical Medicine and Health*. 2022;50(1):1-3.
136. O'Connell T, Rasanathan K, Chopra M. What does universal health coverage mean? *The Lancet*. 2014;383(9913):277-9.
137. Atun R, De Andrade LOM, Almeida G, Cotlear D, Dmytraczenko T, Frenz P, et al. Health-system reform and universal health coverage in Latin America. *The Lancet*. 2015;385(9974):1230-47.
138. Feng XL, Zhang Y, Hu X, Ronsmans C. Tracking progress towards universal health coverage for essential health services in China, 2008–2018. *BMJ Global Health*. 2022;7(11):e010552.
139. Bayked EM, Toleha HN, Kebede SZ, Workneh BD, Kahissay MH. The impact of community-based health insurance on universal health coverage in Ethiopia: a systematic review and meta-analysis. *Global Health Action*. 2023;16(1):2189764.
140. Fisher M, Freeman T, Mackean T, Friel S, Baum F. Universal health coverage for non-communicable diseases and health equity: lessons from Australian primary healthcare. *International Journal of Health Policy and Management*. 2022;11(5):690.
141. Atun R, Aydın S, Chakraborty S, Sümer S, Aran M, Gürol I, et al. Universal health coverage in Turkey: enhancement of equity. *The Lancet*. 2013;382(9886):65-99.
142. Aungkulanon S, Tangcharoensathien V, Shibuya K, Bundhamcharoen K, Chongsuvivatwong V. Post universal health coverage trend and geographical inequalities of mortality in Thailand. *International journal for equity in health*. 2016;15(1):1-12.
143. Tangcharoensathien V, Mills A, Palu T. Accelerating health equity: the key role of universal health coverage in the Sustainable Development Goals. *BMC medicine*. 2015;13:1-5.
144. Ozano K, Dean L, Yoshimura M, MacPherson E, Linou N, Otmani del Barrio M, et al. A call to action for universal health coverage: Why we need to address gender inequities in the neglected tropical diseases community. *PLOS Neglected Tropical Diseases*. 2020;14(3):e0007786.
145. Wenham C, Katz R, Birungi C, Boden L, Eccleston-Turner M, Gostin L, et al. Global health security and universal health coverage: from a marriage of convenience to a strategic, effective partnership. *BMJ global health*. 2019;4(1).
146. Lal A, Abdalla SM, Chattu VK, Erondy NA, Lee T-L, Singh S, et al. Pandemic preparedness and response: exploring the role of universal health coverage within the global health security architecture. *The Lancet Global Health*. 2022;10(11):e1675-e83.
147. Assefa Y, Hill PS, Gilks CF, Damme WV, Pas Rvd, Woldeyohannes S, et al. Global health security and universal health coverage: Understanding convergences and divergences for a synergistic response. *PLoS One*. 2020;15(12):e0244555.
148. Hirose N, Chen S, Shiba K, Patil CL, Rahman MM, Shimpuku Y. Universal health coverage of five essential health services in mothers before and after the Haiti 2010 earthquake: a retrospective cohort study using difference-in-difference. *BMC Health Services Research*. 2022;22(1):1-12.
149. Lee Y, Kim S, Oh J, Lee S. An ecological study on the association between International Health Regulations (IHR) core capacity scores and the Universal Health Coverage (UHC) service coverage index. *Globalization and Health*. 2022;18(1):1-13.
150. Wallace LS. A view of health care around the world. *Annals Family Med*; 2013.
151. World Health Organization. Community-based health insurance drives Ethiopia's bid for universal health coverage 2022 [Available from: <https://www.afro.who.int/countries/ethiopia/news/community-based-health-insurance-drives-ethiopias-bid-universal-health-coverage>].
152. Federal Democratic Republic of Ethiopia Council of Ministers . Social Health Insurance Proclamation 690/2010. Addis Ababa, Ethiopia: Federal Negarit Gazeta. (2010) 5494-5499.

153. Kim TK, Lane SR. Government health expenditure and public health outcomes: A comparative study among 17 countries and implications for US health care reform. *American International Journal of Contemporary Research*. 2013;3(9):8-13.
154. Ghislandi S, Manachotphong W, Perego VM. The impact of Universal Health Coverage on health care consumption and risky behaviours: evidence from Thailand. *Health Economics, Policy and Law*. 2015;10(3):251-66.
155. Syafrawati S, Machmud R, Aljunid SM, Semiarty R. Incidence of moral hazards among health care providers in the implementation of social health insurance toward universal health coverage: evidence from rural province hospitals in Indonesia. *Frontiers in public health*. 2023;11.
156. Zhou T, Ma T. Enhancing China–Africa Health Cooperation for a Healthier and Safer World: A Multilateral Perspective. *China Quarterly of International Strategic Studies*. 2022;8(01):39-59.
157. Barraclough S. Reciprocal health care agreements and Australian health policy. *Australian Health Review: A Publication of the Australian Hospital Association*. 1991;14(4):413-21.
158. Australian-Government-Services-Australia. Reciprocal Health Care Agreements Australia. (Access date: 7 December 2023 Available from: <https://www.servicesaustralia.gov.au/reciprocal-health-care-agreements>).
159. Nabyonga-Orem J, Nabukalu JB, Okuonzi SA. Partnership with private for-profit sector for universal health coverage in sub-Saharan Africa: opportunities and caveats. *BMJ Global Health*. 2019;4(Suppl 9).
160. Iyer V, Sidney K, Mehta R, Mavalankar D. Availability and provision of emergency obstetric care under a public–private partnership in three districts of Gujarat, India: lessons for universal health coverage. *BMJ Global Health*. 2016;1(1).
161. Kickbusch I. BRICS? Contributions to the global health agenda. *Bulletin of the World Health Organization*. 2014;92:463-4.
162. Robert E, Zongo S, Rajan D, Ridde V. Contributing to collaborative health governance in Africa: a realist evaluation of the Universal Health Coverage Partnership. *BMC Health Services Research*. 2022;22(1):1-19.
163. Zanotto BS, da Silva Etges APB, Marcolino MAZ, Polanczyk CA. Value-based healthcare initiatives in practice: a systematic review. *Journal of Healthcare Management*. 2021;66(5):340-65.
164. Porter ME, Teisberg EO. *Redefining health care: creating value-based competition on results*: Harvard business press; 2006.

## Figure

Figure 1. Article selection process

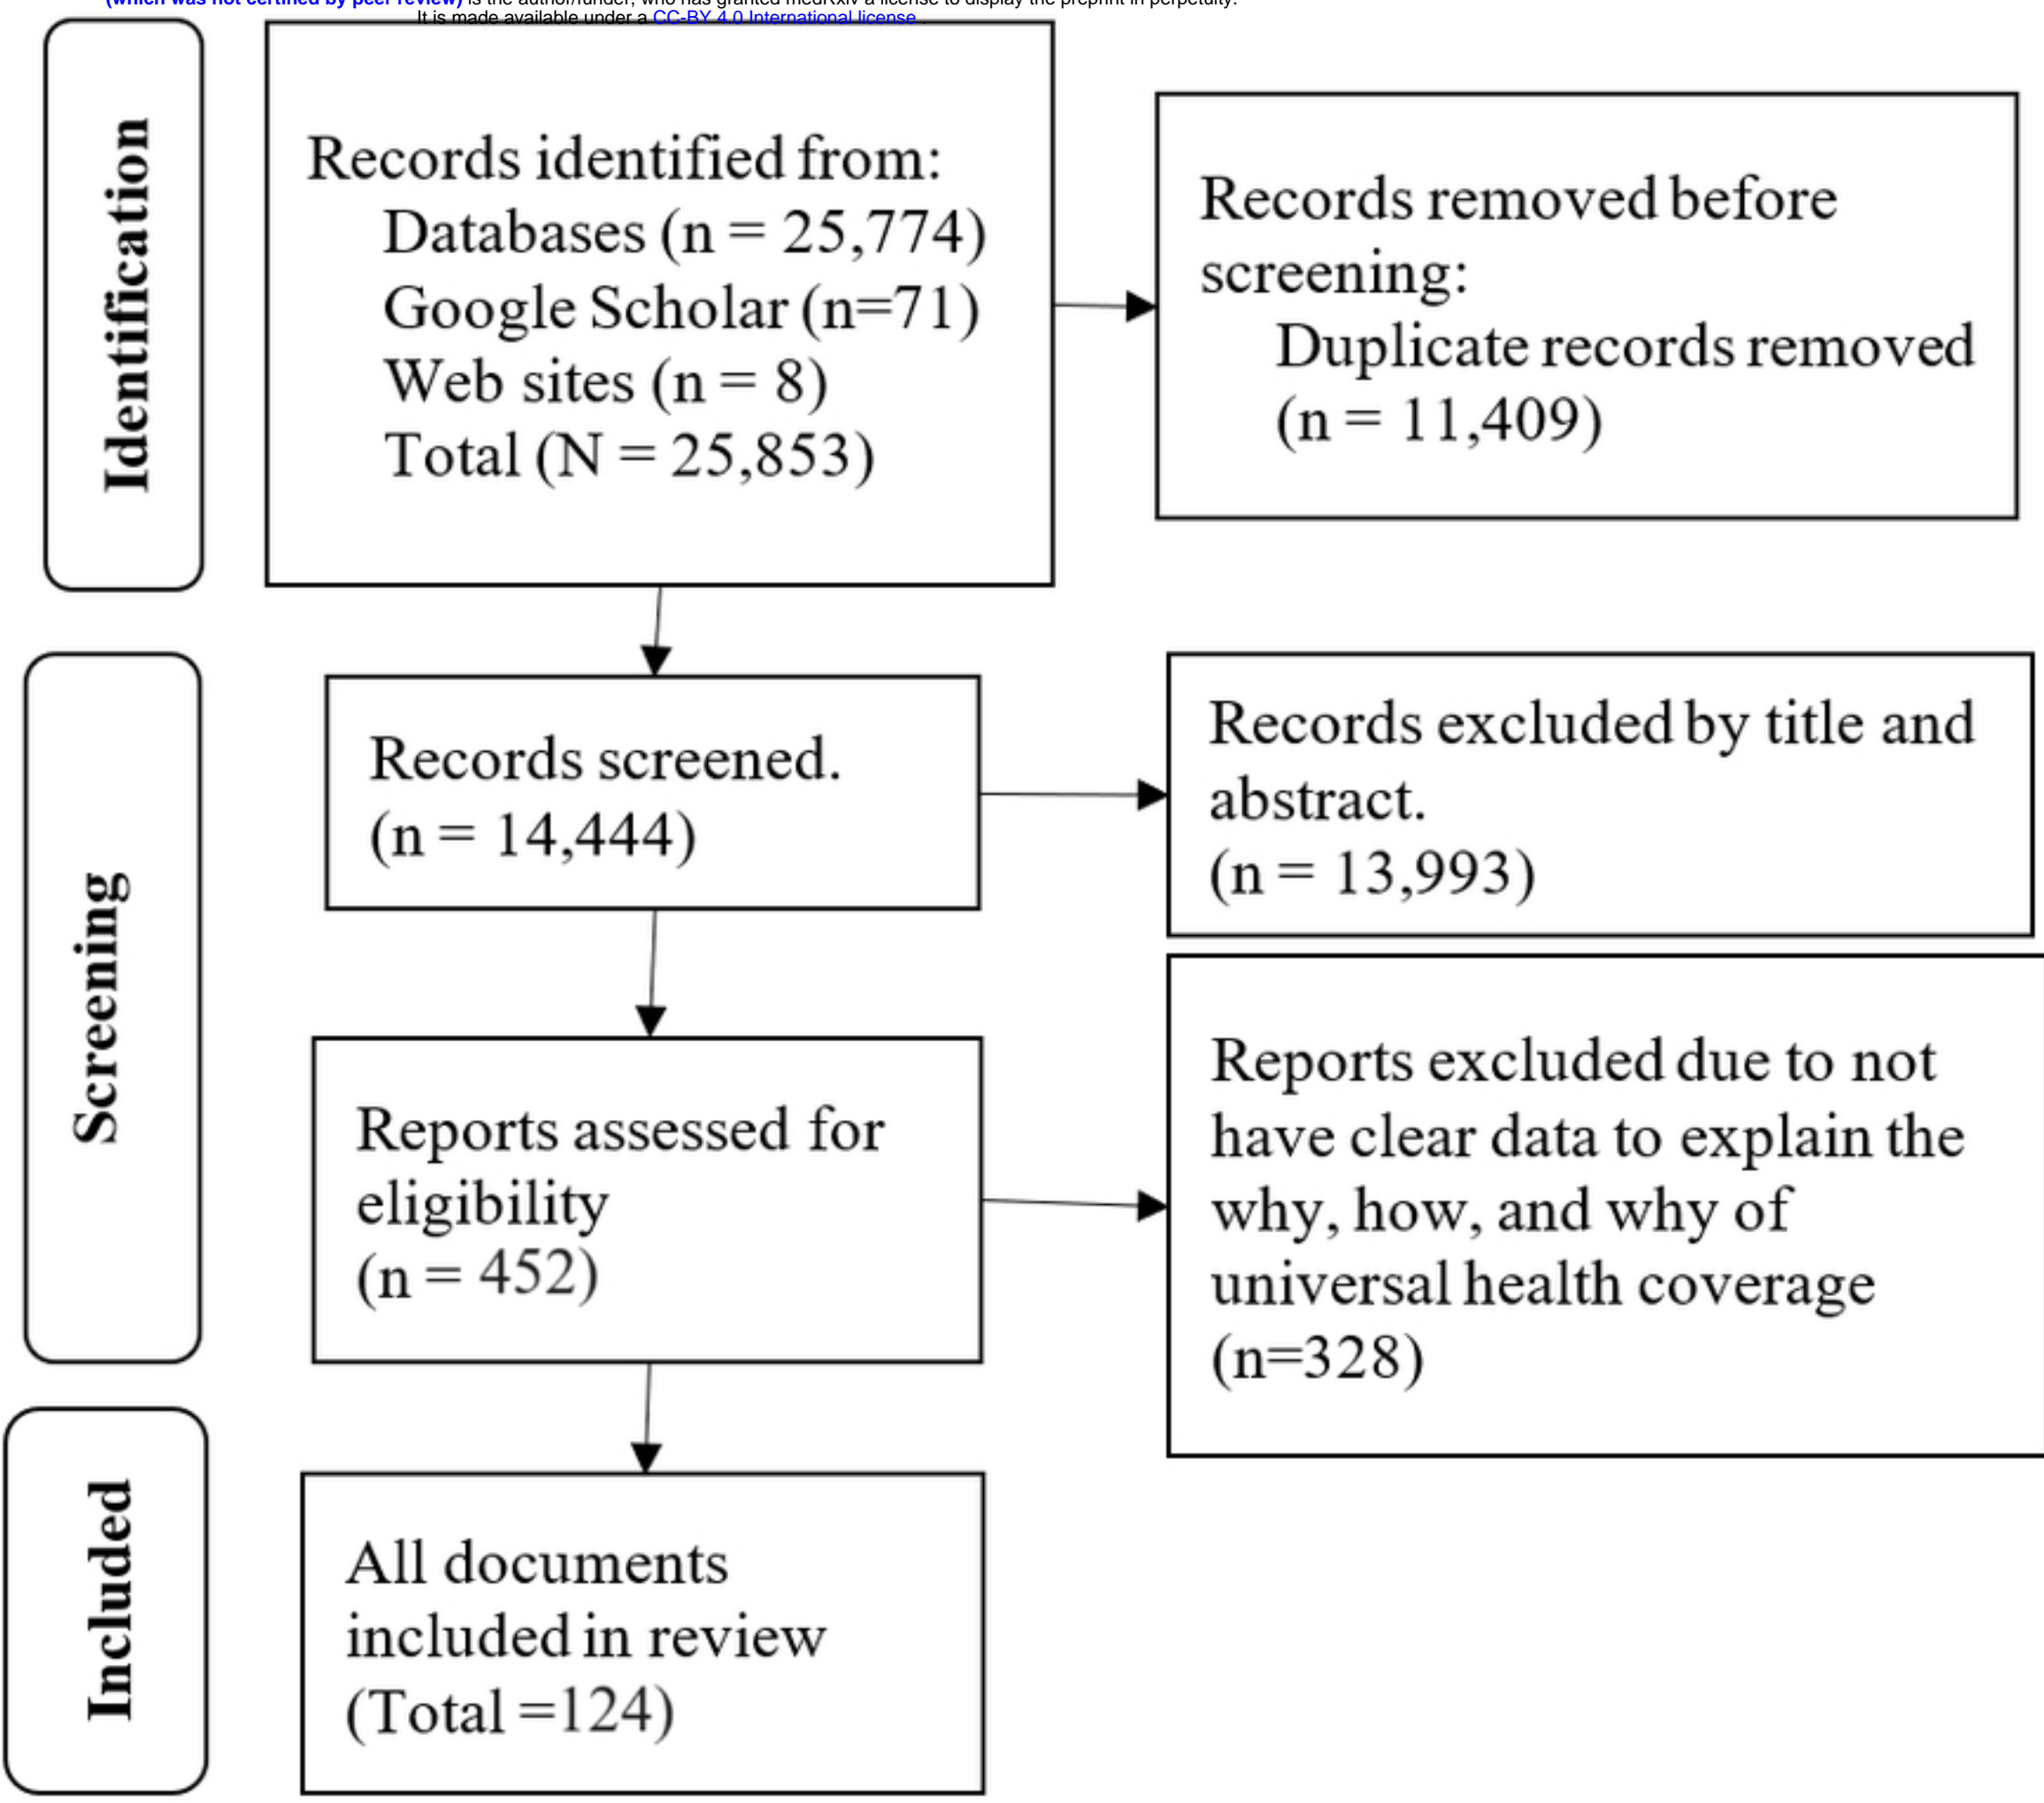

Figure
